# Supplementary material
Source: ML conference proceedings conference paper supplement (https://proceedings.neurips.cc/paper_files/paper/2024/hash/7054d2c49863c1c41be1d53f4377b82a-Abstract.html)
Supplement: Supplementary file 1 [file 7054d2c49863c1c41be1d53f4377b82a-Supplemental-Datasets_and_Benchmarks_Track.pdf]

## 568 **A Datasets**

### 569 **A.1 Dataset format**

570 For each dataset, all unprocessed raw files are represented in .json format. After preprocessing,  
571 we store the graph-type data compatible with PyTorch Geometric (PyG) [9] in the .pt format using  
572 PyTorch. Specifically, we have retained the raw text on nodes, the labels on nodes, the raw text on  
573 edges, and the adjacency matrix. We uniformly store the text embeddings of node and edge text in  
574 .numpy files and load them during data processing.

### 575 **A.2 Datasets license**

576 The datasets are subject to the MIT license. For precise license information, please refer to the  
577 corresponding GitHub repository.

## 578 **B Experiment**

### 579 **B.1 Implementation Details**

580 GNNs are mainly derived from the implementation in the PyG library [9]. For the node classification  
581 task, numerical node labels corresponding to the nodes within the graph are necessary. This involves  
582 converting the categorical node categories found in the original data into numerical node labels within  
583 the graph. For the link prediction, we randomly sample node pairs that do not exist in the graph  
584 as negative samples, along with some edges present as positive samples. For LLM-based predictor  
585 methods, we focus on node classification and link prediction tasks. For node classification, inspired  
586 by the recent LLM-based classification algorithm [26], we use GPT-4 and GPT-3.5-TURBO models  
587 to predict the classification of text nodes by providing the probability for each class. We randomly  
588 select 1,000 text nodes along with all classification labels for this task. For the link prediction task,  
589 we also apply the GPT-4 and GPT-3.5-TURBO models to determine whether two text edges are  
590 related, providing an answer with the corresponding probability. For this task, we randomly select  
591 1,000 pairs of positive text edge indices from the graph and an equal number of negative edges.

### 592 **B.2 Effectiveness Analysis for Link Prediction**

593 In this subsection, we further analyze the link prediction from the various models applied in the study.  
594 Table 6 and 7 represent the effect of link prediction on different datasets from various distinct. We can  
595 further draw several observations from Table 6 and 7. First, For PLM-based and GNN-based methods,  
596 the state-of-the-art methods for Goodreads-Comics and Goodreads-History datasets are GeneralConv  
597 and GINE, respectively. Under the condition of using the same embeddings, they outperform the  
598 worst method by approximately 6% and 7% in terms of AUC and F1 across these two datasets. For  
599 the Reddit dataset, the state-of-the-art method is GeneralConv. It outperforms the worst method by  
600 approximately 3% and 5% in terms of AUC and F1, respectively. Second, for the LLM as a predictor  
601 method, we find that they do not perform well in predicting links. The best method among them has  
602 an AUC and F1 gap of approximately 10% - 30% compared to the best PLM-based and GNN-based  
603 methods for all datasets. Third, Using edge text provides at least approximately a 3% improvement  
604 in AUC and at least approximately an 8% improvement in F1 compared to not using edge text for all  
605 datasets.

### 606 **B.3 Effectiveness Analysis for Node Classification**

607 In this subsection, we further analyze the node classification results from various models. Table 8  
608 and 9 display the impact on different datasets. We can derive some insights. First, for PLM-based  
609 and GNN-based methods, the state-of-the-art models for Goodreads-Comics and Goodreads-History  
610 are GeneralConv and GINE, respectively, outperforming the worst method by approximately 8% and  
611 15% in AUC-micro and F1-micro for Goodreads-Comics, and by 6% and 9% for Goodreads-History.  
612 GraphTransformer outperforms the worst method by approximately 2% and 1% in ACC and F1 for  
613 Citation. Second, LLM as Predictor methods perform poorly in node classification, with the best  
614 method showing an AUC-micro gap of about 20% compared to the best PLM-based and GNN-based  
615 methods. Their low F1-micro score could be due to the large number of predicted categories. Third,

Table 6: Link prediction AUC and F1 among PLM-based, GNN-based methods. The best method for each PLM embedding on each dataset is shown in bold.

| Methods          | Goodreads-Comics |               |               |               |               |               |               |               | Goodreads-History |               |               |               |               |               |
|------------------|------------------|---------------|---------------|---------------|---------------|---------------|---------------|---------------|-------------------|---------------|---------------|---------------|---------------|---------------|
|                  | GPT-3.5-TURBO    |               | BERT-Large    |               | BERT          |               | None          |               | BERT-Large        |               | BERT          |               | None          |               |
|                  | AUC              | F1            | AUC           | F1            | AUC           | F1            | AUC           | F1            | AUC               | F1            | AUC           | F1            | AUC           | F1            |
| MLP              | 0.8902           | 0.8136        | 0.8900        | 0.8130        | 0.8900        | 0.8128        | 0.8928        | 0.8167        | 0.8922            | 0.8897        | 0.8923        | 0.8897        | 0.8913        | 0.8149        |
| GraphSAGE        | 0.9406           | 0.8689        | 0.9511        | 0.8854        | 0.9537        | 0.8860        | 0.9403        | 0.8732        | 0.9587            | 0.8702        | 0.9591        | 0.8698        | 0.9053        | 0.8320        |
| GeneralConv      | 0.9478           | 0.8843        | <b>0.9535</b> | <b>0.8930</b> | <b>0.9544</b> | <b>0.8942</b> | <b>0.9458</b> | <b>0.8825</b> | 0.9624            | <b>0.8900</b> | 0.9629        | 0.8897        | 0.9117        | 0.8426        |
| GINE             | <b>0.9489</b>    | <b>0.8870</b> | 0.9480        | 0.8857        | 0.9471        | 0.8833        | 0.9446        | 0.8819        | <b>0.9631</b>     | 0.8669        | <b>0.9634</b> | <b>0.8937</b> | <b>0.9132</b> | <b>0.8448</b> |
| EdgeConv         | 0.9448           | 0.8819        | 0.9495        | 0.8867        | 0.9477        | 0.8853        | 0.9444        | 0.8810        | 0.9457            | 0.8695        | 0.9456        | 0.8650        | 0.9036        | 0.8345        |
| GraphTransformer | 0.9380           | 0.8687        | 0.9433        | 0.8747        | 0.9466        | 0.8781        | 0.9362        | 0.8661        | 0.9589            | 0.8698        | 0.9590        | 0.8690        | 0.8985        | 0.8256        |

| Methods          | Reddit        |               |               |               |               |               |               |               |
|------------------|---------------|---------------|---------------|---------------|---------------|---------------|---------------|---------------|
|                  | GPT-3.5-TURBO |               | BERT-Large    |               | BERT          |               | None          |               |
|                  | AUC           | F1            | AUC           | F1            | AUC           | F1            | AUC           | F1            |
| MLP              | 0.9909        | 0.9651        | 0.9866        | 0.9576        | 0.8900        | 0.8128        | 0.8928        | 0.8167        |
| GraphSAGE        | 0.9908        | 0.9810        | 0.9897        | 0.9800        | 0.9537        | 0.8860        | 0.9403        | 0.8732        |
| GeneralConv      | <b>0.9964</b> | 0.9809        | 0.9956        | <b>0.9815</b> | <b>0.9544</b> | <b>0.8942</b> | <b>0.9458</b> | <b>0.8825</b> |
| GINE             | 0.9962        | 0.9809        | <b>0.9958</b> | 0.9801        | 0.9471        | 0.8833        | 0.9446        | 0.8819        |
| EdgeConv         | 0.9926        | <b>0.9818</b> | 0.9926        | 0.9803        | 0.9477        | 0.8853        | 0.9444        | 0.8810        |
| GraphTransformer | 0.9944        | 0.9810        | 0.9940        | 0.9803        | 0.9466        | 0.8781        | 0.9362        | 0.8661        |

Table 7: Link prediction results for LLM as Predictor methods. The best method on each dataset is shown in bold.

| Methods       | Goodreads-Comics |               | Goodreads-History |               | Reddit        |               |
|---------------|------------------|---------------|-------------------|---------------|---------------|---------------|
|               | AUC              | F1            | AUC               | F1            | AUC           | F1            |
| GPT-3.5-TURBO | 0.4565           | <b>0.3588</b> | 0.6031            | 0.5234        | 0.4980        | 0.3440        |
| GPT-4         | <b>0.5446</b>    | 0.2461        | <b>0.8661</b>     | <b>0.8685</b> | <b>0.6632</b> | <b>0.6478</b> |

Table 8: Node Classification ACC, Micro-AUC, Micro-F1 and F1 among PLM-based, GNN-based methods. AUC\* and F1\* represent Micro-AUC and Micro-F1 respectively. The best method for each PLM embedding on each dataset is shown in bold.

| Methods          | Goodreads-Comics |               |               |               |               |               |               |               | Goodreads-History |               |               |               |               |               |
|------------------|------------------|---------------|---------------|---------------|---------------|---------------|---------------|---------------|-------------------|---------------|---------------|---------------|---------------|---------------|
|                  | GPT-3.5-TURBO    |               | BERT-Large    |               | BERT          |               | None          |               | BERT-Large        |               | BERT          |               | None          |               |
|                  | AUC*             | F1*           | AUC*          | F1*           | AUC*          | F1*           | AUC*          | F1*           | AUC*              | F1*           | AUC*          | F1*           | AUC*          | F1*           |
| MLP              | 0.8361           | 0.5117        | 0.8360        | 0.5211        | 0.8370        | 0.5214        | 0.8373        | 0.5214        | 0.7831            | 0.8099        | 0.7825        | 0.8097        | 0.7824        | 0.8096        |
| GraphSAGE        | 0.9068           | 0.7379        | 0.8965        | 0.7118        | 0.8965        | 0.7088        | 0.8689        | 0.6401        | 0.8543            | 0.8975        | 0.8538        | 0.8970        | 0.8044        | 0.8088        |
| GeneralConv      | <b>0.9107</b>    | <b>0.7455</b> | <b>0.8982</b> | 0.7134        | <b>0.8991</b> | 0.7116        | <b>0.8739</b> | 0.6541        | 0.8543            | 0.8986        | 0.8538        | 0.8981        | 0.8119        | 0.8126        |
| GINE             | 0.9006           | 0.7187        | 0.8943        | 0.7084        | 0.8932        | 0.7140        | 0.8627        | 0.6457        | 0.8541            | <b>0.9015</b> | 0.8549        | <b>0.9022</b> | <b>0.8133</b> | <b>0.8226</b> |
| EdgeConv         | 0.9015           | 0.7127        | 0.8923        | 0.7066        | 0.8931        | 0.7089        | 0.8648        | 0.6260        | 0.8520            | 0.8974        | 0.8515        | 0.8960        | 0.8059        | 0.8116        |
| GraphTransformer | 0.9027           | 0.7285        | 0.8940        | <b>0.7175</b> | 0.8966        | <b>0.7151</b> | 0.8704        | <b>0.6554</b> | <b>0.8555</b>     | 0.9009        | <b>0.8647</b> | 0.8995        | 0.8101        | 0.8089        |

| Methods          | Reddit        |               |               |               |               |               |               |               |
|------------------|---------------|---------------|---------------|---------------|---------------|---------------|---------------|---------------|
|                  | GPT-3.5-TURBO |               | BERT-Large    |               | BERT          |               | None          |               |
|                  | ACC           | F1            | ACC           | F1            | ACC           | F1            | ACC           | F1            |
| MLP              | 0.9839        | 0.9817        | 0.9793        | 0.9774        | 0.9803        | 0.9784        | 0.9795        | 0.9779        |
| GraphSAGE        | 0.9974        | 0.9962        | <b>0.9975</b> | 0.9964        | 0.9973        | 0.9963        | <b>0.9974</b> | <b>0.9965</b> |
| GeneralConv      | <b>0.9975</b> | <b>0.9966</b> | 0.9974        | 0.9963        | 0.9973        | 0.9964        | 0.9973        | 0.9964        |
| GINE             | 0.9973        | 0.9962        | 0.9973        | 0.9963        | <b>0.9974</b> | 0.9965        | <b>0.9974</b> | 0.9962        |
| EdgeConv         | 0.9973        | 0.9960        | 0.9973        | 0.9960        | 0.9973        | 0.9960        | 0.9973        | 0.9959        |
| GraphTransformer | 0.9973        | 0.9963        | 0.9974        | <b>0.9965</b> | <b>0.9974</b> | <b>0.9966</b> | 0.9973        | 0.9964        |

Table 9: Node Classification ACC, Micro-AUC, Micro-F1 and F1 for LLM as Predictor methods. AUC\* and F1\* represent Micro-AUC and Micro-F1 respectively. The best method on each dataset is shown in bold.

| Methods       | Goodreads-Comics |               | Goodreads-History |               | Reddit        |               |
|---------------|------------------|---------------|-------------------|---------------|---------------|---------------|
|               | AUC*             | F1*           | AUC*              | F1*           | ACC           | F1            |
| GPT-3.5-TURBO | 0.4900           | 0.0400        | 0.6827            | 0.4147        | 0.8625        | 0.9262        |
| GPT-4         | <b>0.5600</b>    | <b>0.0600</b> | <b>0.8202</b>     | <b>0.7394</b> | <b>0.9767</b> | <b>0.9882</b> |

616 incorporating edge text results in at least a 3% improvement in AUC-micro and a 6% improvement in  
617 F1-micro across almost all datasets, compared to not using edge text.

## 618 C Discussion

619 Notably, employing APIs like GPT4 for extensive graph tasks may result in considerable expenses  
620 under current billing models. Additionally, deploying open-source large models such as LLaMa for  
621 tasks like parameter updates or inference in local environments demands substantial computational

622 resources and storage capacity. Consequently, enhancing the efficiency of LLMs for graph-related  
623 tasks remains a critical concern. Moreover, the constraints imposed by context windows in LLMs  
624 also impact their effectiveness in encoding node and edge text within TEGs.

## 625 **D Limitation**

626 Comprehensive evaluation of tasks often demands significant computational resources, which can be  
627 a burden for researchers and smaller organizations.
